# Supplementary material for: Three-photon-induced singlet excited-state absorption for tunable ultrafast optical-limiting in distyrylbenzene: a first-principles study
Source: Royal Society of Chemistry journal article supplement (doi:10.1039/d2cp01753a), 2022-01-01
Supplement: d2cp01753a1.pdf [file d2cp01753a1.pdf]

**Three-Photon-Induced Singlet Excited-State Absorption for  
the Tunable Ultrafast Optical-Limiting in Distyrylbenzene:  
A First-Principles Study  
(Supporting Information)**

Danyang Zhang<sup>1</sup>, Hongjuan Zhu<sup>1</sup>, Chunrui Wang<sup>2</sup>,  
Shuying Kang<sup>3</sup>, Yong Zhou<sup>1</sup>, Xiaowei Sheng<sup>1\*</sup>

*1. Anhui Province Key Laboratory of Optoelectric Materials Science and Technology,  
Department of Physics, Anhui Normal University, Anhui, Wuhu 241000, China and*

*2. State Key Laboratory of Laser Interaction with Matter, Changchun Institute of  
Optics, Fine Mechanics and Physics, Chinese Academy of Science, Changchun  
130033, China and*

*3. School of Physics and Electronic Information, Gannan Normal University,  
Ganzhou 341000, China*

**E-mail: [xwsheng@mail.ahnu.edu.cn](mailto:xwsheng@mail.ahnu.edu.cn)**

Table S1. Excitation energy  $\Delta E$ , 2PA energy  $E_{2PA}$ , 2PA transition probability  $\delta_{2PA}$ , 3PA energy  $E_{3PA}$  and 3PA transition probability  $\delta_{3PA}$  for linear polarized light of the lowest six singlet excited states of DSB molecule in vacuum using different functionals under 6-311G(d,p) basis set.

| <b>B3LYP</b>     |           | $\Delta E$ |           | $E_{2PA}$ |             | $\delta_{2PA}$ | $E_{3PA}$ |             | $\delta_{3PA}$ |
|------------------|-----------|------------|-----------|-----------|-------------|----------------|-----------|-------------|----------------|
| State            | <i>eV</i> | <i>nm</i>  | <i>eV</i> | <i>nm</i> | <i>a.u.</i> | <i>eV</i>      | <i>nm</i> | <i>a.u.</i> |                |
| $S_1$            | 3.27      | 379.20     | 1.64      | 756.10    | 0.00        | 1.09           | 1137.61   | 3.60E9      |                |
| $S_2$            | 3.98      | 311.56     | 1.99      | 623.12    | 2.16E5      | 1.33           | 932.33    | 0.00        |                |
| $S_3$            | 4.31      | 287.70     | 2.16      | 574.07    | 0.00        | 1.44           | 861.11    | 1.51E8      |                |
| $S_4$            | 4.41      | 281.18     | 2.21      | 561.09    | 2.55E2      | 1.47           | 843.54    | 0.00        |                |
| $S_5$            | 4.48      | 276.79     | 2.24      | 553.57    | 0.00        | 1.49           | 832.21    | 9.22E6      |                |
| $S_6$            | 4.52      | 274.34     | 2.26      | 548.67    | 3.89E3      | 1.51           | 821.19    | 0.00        |                |
| <b>CAM-B3LYP</b> |           | $\Delta E$ |           | $E_{2PA}$ |             | $\delta_{2PA}$ | $E_{3PA}$ |             | $\delta_{3PA}$ |
| State            | <i>eV</i> | <i>nm</i>  | <i>eV</i> | <i>nm</i> | <i>a.u.</i> | <i>eV</i>      | <i>nm</i> | <i>a.u.</i> |                |
| $S_1$            | 3.66      | 338.80     | 1.83      | 677.60    | 0.00        | 1.22           | 1016.39   | 9.10E8      |                |
| $S_2$            | 4.75      | 261.05     | 2.38      | 521.01    | 0.00        | 1.58           | 784.81    | 2.22E7      |                |
| $S_3$            | 4.75      | 261.05     | 2.38      | 521.01    | 5.39E2      | 1.58           | 784.81    | 0.00        |                |
| $S_4$            | 5.03      | 246.52     | 2.52      | 492.06    | 0.00        | 1.68           | 738.10    | 6.89E6      |                |
| $S_5$            | 5.04      | 246.03     | 2.52      | 492.06    | 1.09E4      | 1.68           | 738.10    | 0.00        |                |
| $S_6$            | 5.22      | 237.55     | 2.61      | 475.10    | 3.26E5      | 1.74           | 712.64    | 0.00        |                |

Table S2. 2PA energy  $E_{2PA}$  (*eV*), 2PA transition probability  $\delta_{2PA}$  (*a.u.*), 3PA energy  $E_{3PA}$  (*eV*) and 3PA transition probability  $\delta_{3PA}$  (*a.u.*) for linear polarized light of the lowest six singlet excited states of molecules in vacuum at BHandHLYP/6-311G(d,p) level.

| State | DSB-1     |                | DSB       |                | DSB+1     |                | DSB+2     |                | DSB+3     |                |
|-------|-----------|----------------|-----------|----------------|-----------|----------------|-----------|----------------|-----------|----------------|
|       | $E_{2PA}$ | $\delta_{2PA}$ |
| $S_1$ | 2.17      | 0.00           | 1.82      | 0.00           | 1.66      | 0.00           | 1.58      | 0.00           | 1.53      | 0.00           |
| $S_2$ | 2.59      | 0.00           | 2.39      | 1.21E3         | 2.09      | 9.27E2         | 1.91      | 8.18E2         | 1.80      | 7.41E2         |
| $S_3$ | 2.60      | 2.09E2         | 2.43      | 0.00           | 2.32      | 9.66E5         | 2.19      | 2.10E6         | 2.06      | 0.00           |
| $S_4$ | 2.95      | 6.20E2         | 2.55      | 1.94E5         | 2.41      | 0.00           | 2.23      | 0.00           | 2.12      | 3.53E6         |
| $S_5$ | 3.06      | 0.00           | 2.56      | 0.00           | 2.42      | 3.26E4         | 2.39      | 0.00           | 2.32      | 0.00           |
| $S_6$ | 3.08      | 1.75E4         | 2.59      | 1.22E5         | 2.48      | 0.00           | 2.41      | 0.00           | 2.39      | 0.00           |
| State | DSB-1     |                | DSB       |                | DSB+1     |                | DSB+2     |                | DSB+3     |                |
|       | $E_{3PA}$ | $\delta_{3PA}$ |
| $S_1$ | 1.44      | 3.49E7         | 1.21      | 9.74E8         | 1.11      | 6.45E9         | 1.05      | 2.08E10        | 1.02      | 4.47E10        |
| $S_2$ | 1.72      | 8.03E5         | 1.59      | 0.00           | 1.39      | 0.00           | 1.27      | 0.00           | 1.20      | 0.00           |
| $S_3$ | 1.73      | 0.00           | 1.62      | 2.46E7         | 1.54      | 0.00           | 1.46      | 0.00           | 1.37      | 5.91E9         |
| $S_4$ | 1.96      | 0.00           | 1.70      | 0.00           | 1.60      | 2.74E8         | 1.48      | 4.40E9         | 1.41      | 0.00           |
| $S_5$ | 2.04      | 8.60E6         | 1.71      | 6.99E6         | 1.61      | 0.00           | 1.59      | 6.50E9         | 1.54      | 7.36E9         |
| $S_6$ | 2.05      | 0.00           | 1.72      | 0.00           | 1.65      | 2.28E9         | 1.61      | 6.97E8         | 1.59      | 3.30E11        |

Table S3. Cartesian coordinates of DSB, DSB dimer and DSB trimer in  $S_0$  state.

| DSB   |          |          |   | DSB trimer |          |          |          |
|-------|----------|----------|---|------------|----------|----------|----------|
| Atoms | X        | Y        | Z | Atoms      | X        | Y        | Z        |
| C     | -6.15848 | 3.892108 | 0 | C          | -8.07656 | -1.02069 | -2.98222 |
| C     | -4.96229 | 3.204898 | 0 | C          | -6.68913 | -1.02365 | -2.94075 |
| C     | -4.93791 | 1.808884 | 0 | C          | -6.00317 | -1.42576 | -1.78033 |
| C     | -6.15848 | 1.135865 | 0 | C          | -6.763   | -1.84234 | -0.6769  |
| C     | -7.35817 | 1.823785 | 0 | C          | -8.15247 | -1.83789 | -0.71837 |
| C     | -7.36404 | 3.206475 | 0 | C          | -8.8177  | -1.42471 | -1.86933 |
| H     | -6.15285 | 4.968718 | 0 | H          | -8.58522 | -0.70719 | -3.88681 |
| H     | -4.04167 | 3.761115 | 0 | H          | -6.13487 | -0.71765 | -3.81972 |
| H     | -6.16289 | 0.058567 | 0 | H          | -6.25533 | -2.15093 | 0.227396 |
| H     | -8.28662 | 1.278943 | 0 | H          | -8.71163 | -2.15025 | 0.155393 |
| H     | -8.29492 | 3.746574 | 0 | H          | -9.90085 | -1.41975 | -1.90491 |
| C     | -0.00103 | 1.371431 | 0 | C          | -1.48459 | -0.11814 | -3.38734 |
| C     | 1.195712 | 0.69022  | 0 | C          | -0.10085 | -0.08751 | -3.35514 |
| C     | 1.227206 | -0.70386 | 0 | C          | 0.61436  | -0.80588 | -2.38105 |
| C     | 0.001028 | -1.37143 | 0 | C          | -0.12847 | -1.56302 | -1.45895 |
| C     | -1.19571 | -0.69022 | 0 | C          | -1.5111  | -1.59053 | -1.48795 |
| C     | -1.22721 | 0.703859 | 0 | C          | -2.2282  | -0.86418 | -2.45306 |
| H     | 0.007273 | 2.448753 | 0 | H          | -2.01265 | 0.441057 | -4.15267 |
| H     | 2.112218 | 1.253167 | 0 | H          | 0.427961 | 0.493862 | -4.10062 |
| H     | -0.00727 | -2.44875 | 0 | H          | 0.397919 | -2.12845 | -0.70154 |
| H     | -2.11222 | -1.25317 | 0 | H          | -2.03875 | -2.18404 | -0.75338 |
| C     | 6.158478 | -1.13587 | 0 | C          | 5.080119 | 0.959186 | -3.63599 |
| C     | 7.358169 | -1.82379 | 0 | C          | 6.47094  | 0.994793 | -3.62404 |
| C     | 7.364043 | -3.20648 | 0 | C          | 7.183963 | 0.081918 | -2.8513  |
| C     | 6.158478 | -3.89211 | 0 | C          | 6.495049 | -0.85348 | -2.07801 |
| C     | 4.962293 | -3.2049  | 0 | C          | 5.108472 | -0.88841 | -2.08991 |
| C     | 4.937914 | -1.80888 | 0 | C          | 4.370361 | 0.012495 | -2.87794 |
| H     | 6.162887 | -0.05857 | 0 | H          | 4.528417 | 1.666387 | -4.24622 |
| H     | 8.286621 | -1.27894 | 0 | H          | 6.995699 | 1.731735 | -4.22116 |
| H     | 8.294921 | -3.74657 | 0 | H          | 8.267521 | 0.098921 | -2.84461 |
| H     | 6.152849 | -4.96872 | 0 | H          | 7.040763 | -1.55394 | -1.45991 |
| H     | 4.041669 | -3.76112 | 0 | H          | 4.596581 | -1.62251 | -1.48219 |
| C     | -3.70508 | 1.022199 | 0 | C          | -4.54579 | -1.4096  | -1.66388 |
| C     | -2.45717 | 1.490494 | 0 | C          | -3.68393 | -0.8689  | -2.54549 |
| C     | 2.457168 | -1.49049 | 0 | C          | 2.068921 | -0.79233 | -2.26978 |
| C     | 3.705084 | -1.0222  | 0 | C          | 2.91154  | -0.00347 | -2.96242 |
| H     | -3.8619  | -0.04506 | 0 | H          | -4.15759 | -1.85556 | -0.75305 |
| H     | -2.29984 | 2.557648 | 0 | H          | -4.0799  | -0.37358 | -3.42813 |
| H     | 2.299843 | -2.55765 | 0 | H          | 2.473455 | -1.47424 | -1.52794 |
| H     | 3.861896 | 0.04506  | 0 | H          | 2.497251 | 0.70618  | -3.6736  |

| DSB dimer |          |          |          | C | 7.623259 | -3.57976 | 0.478255 |
|-----------|----------|----------|----------|---|----------|----------|----------|
| Atoms     | X        | Y        | Z        | C | 6.281413 | -3.2782  | 0.670534 |
| C         | -8.83481 | -0.50537 | -1.56268 | C | 5.889126 | -2.02069 | 1.162003 |
| C         | -7.48981 | -0.75592 | -1.33081 | C | 6.890728 | -1.07848 | 1.441047 |
| C         | -7.01965 | -1.0349  | -0.03576 | C | 8.233935 | -1.38138 | 1.25032  |
| C         | -7.95692 | -1.05998 | 1.009346 | C | 8.608361 | -2.63328 | 0.768309 |
| C         | -9.30495 | -0.80785 | 0.778675 | H | 7.904173 | -4.55181 | 0.089269 |
| C         | -9.7519  | -0.52626 | -0.50995 | H | 5.530832 | -4.01533 | 0.411732 |
| H         | -9.17347 | -0.28838 | -2.56952 | H | 6.608026 | -0.09763 | 1.800324 |
| H         | -6.79638 | -0.72136 | -2.16162 | H | 8.984206 | -0.63111 | 1.468567 |
| H         | -7.61305 | -1.26917 | 2.016649 | H | 9.654155 | -2.86987 | 0.61083  |
| H         | -10.0063 | -0.82969 | 1.605014 | C | 1.080614 | -3.14459 | 1.728037 |
| H         | -10.8008 | -0.32689 | -0.69509 | C | -0.26588 | -2.85734 | 1.880097 |
| C         | -2.22594 | -1.38663 | -1.30384 | C | -0.72097 | -1.52802 | 1.901391 |
| C         | -0.86951 | -1.50754 | -1.05946 | C | 0.240525 | -0.51077 | 1.769861 |
| C         | -0.37909 | -1.61859 | 0.251537 | C | 1.585435 | -0.79644 | 1.622134 |
| C         | -1.32198 | -1.59139 | 1.295375 | C | 2.041791 | -2.12474 | 1.593557 |
| C         | -2.67906 | -1.47826 | 1.050443 | H | 1.405663 | -4.17934 | 1.701023 |
| C         | -3.16999 | -1.37748 | -0.26104 | H | -0.9713  | -3.67563 | 1.958692 |
| H         | -2.57699 | -1.29292 | -2.32628 | H | -0.08613 | 0.520321 | 1.762978 |
| H         | -0.18131 | -1.49773 | -1.8952  | H | 2.283295 | 0.020863 | 1.50127  |
| H         | -0.96866 | -1.65863 | 2.319175 | C | -5.48901 | -2.5667  | 2.833079 |
| H         | -3.3643  | -1.44934 | 1.888265 | C | -6.83601 | -2.25368 | 2.989017 |
| C         | 4.393315 | -2.14789 | -1.01135 | C | -7.28693 | -0.96384 | 2.720555 |
| C         | 5.758941 | -2.23144 | -0.76475 | C | -6.38133 | 0.006185 | 2.288631 |
| C         | 6.242491 | -2.10187 | 0.53281  | C | -5.03841 | -0.30485 | 2.135222 |
| C         | 5.344531 | -1.88571 | 1.578415 | C | -4.56171 | -1.59845 | 2.41208  |
| C         | 3.980643 | -1.8071  | 1.333122 | H | -5.14135 | -3.57246 | 3.044175 |
| C         | 3.473902 | -1.94095 | 0.030025 | H | -7.53136 | -3.0177  | 3.317525 |
| H         | 4.02188  | -2.24187 | -2.02657 | H | -8.33582 | -0.71606 | 2.832867 |
| H         | 6.448925 | -2.38128 | -1.5866  | H | -6.72589 | 1.004249 | 2.054169 |
| H         | 7.307445 | -2.13857 | 0.725264 | H | -4.3599  | 0.460007 | 1.781839 |
| H         | 5.714401 | -1.77007 | 2.591053 | C | 4.490413 | -1.64305 | 1.360407 |
| H         | 3.303877 | -1.62402 | 2.158322 | C | 3.443063 | -2.48682 | 1.412135 |
| C         | -5.61119 | -1.25417 | 0.27841  | C | -2.12619 | -1.15299 | 2.012059 |
| C         | -4.58197 | -1.22569 | -0.58564 | C | -3.15526 | -1.97578 | 2.286628 |
| C         | 1.035937 | -1.73178 | 0.577806 | H | 4.321607 | -0.57744 | 1.484936 |
| C         | 2.053174 | -1.85229 | -0.2929  | H | 3.628557 | -3.5545  | 1.330047 |
| H         | -5.40727 | -1.42561 | 1.330684 | H | -2.32225 | -0.09589 | 1.859005 |
| H         | -4.78521 | -1.05514 | -1.63823 | H | -2.95256 | -3.02816 | 2.466348 |
| H         | 1.256115 | -1.71133 | 1.640723 | C | -7.07432 | 3.5108   | 1.07893  |
| H         | 1.83097  | -1.88919 | -1.35494 | C | -5.69168 | 3.407082 | 1.002164 |
| C         | 8.834703 | 0.504516 | -1.56261 | C | -5.08574 | 2.577186 | 0.041767 |

|   |          |          |          |   |          |          |          |
|---|----------|----------|----------|---|----------|----------|----------|
| C | 7.489751 | 0.755386 | -1.33082 | C | -5.92042 | 1.871766 | -0.83832 |
| C | 7.019633 | 1.034791 | -0.03584 | C | -7.30449 | 1.96517  | -0.75533 |
| C | 7.956909 | 1.059979 | 1.009259 | C | -7.88896 | 2.787022 | 0.20468  |
| C | 9.304891 | 0.807531 | 0.778661 | H | -7.52186 | 4.157195 | 1.825359 |
| C | 9.751798 | 0.525505 | -0.50988 | H | -5.0803  | 3.978622 | 1.689641 |
| H | 9.173323 | 0.287195 | -2.56939 | H | -5.46965 | 1.225477 | -1.57858 |
| H | 6.79632  | 0.720736 | -2.16162 | H | -7.91892 | 1.38442  | -1.43194 |
| H | 7.613077 | 1.269482 | 2.01651  | H | -8.96758 | 2.864822 | 0.275392 |
| H | 10.00624 | 0.829457 | 1.604998 | C | -0.4235  | 3.19887  | 1.658535 |
| H | 10.80066 | 0.32587  | -0.69497 | C | 0.955042 | 3.0894   | 1.587466 |
| C | 2.225986 | 1.386875 | -1.30405 | C | 1.576624 | 2.53206  | 0.456506 |
| C | 0.869551 | 1.507727 | -1.05968 | C | 0.745441 | 2.111542 | -0.59635 |
| C | 0.379116 | 1.61864  | 0.251325 | C | -0.63244 | 2.207052 | -0.52115 |
| C | 1.321982 | 1.591379 | 1.295177 | C | -1.25557 | 2.752657 | 0.614149 |
| C | 2.679067 | 1.478325 | 1.050245 | H | -0.87815 | 3.636285 | 2.541035 |
| C | 3.170014 | 1.37764  | -0.26124 | H | 1.553292 | 3.450599 | 2.414833 |
| H | 2.577058 | 1.293237 | -2.32649 | H | 1.2006   | 1.680824 | -1.47699 |
| H | 0.181342 | 1.497934 | -1.89542 | H | -1.22471 | 1.850333 | -1.35366 |
| H | 0.968644 | 1.658479 | 2.318978 | C | 6.139451 | 2.580031 | 2.386121 |
| H | 3.364289 | 1.449234 | 1.888072 | C | 7.528418 | 2.515902 | 2.357776 |
| C | -4.39334 | 2.147928 | -1.01147 | C | 8.188322 | 2.281563 | 1.154028 |
| C | -5.75897 | 2.231414 | -0.76484 | C | 7.444587 | 2.097108 | -0.01199 |
| C | -6.24246 | 2.102071 | 0.532761 | C | 6.058394 | 2.153117 | 0.015018 |
| C | -5.34444 | 1.886197 | 1.578379 | C | 5.376148 | 2.407458 | 1.218236 |
| C | -3.98056 | 1.80765  | 1.333051 | H | 5.628919 | 2.770199 | 3.32411  |
| C | -3.47388 | 1.94124  | 0.029903 | H | 8.093171 | 2.651817 | 3.272798 |
| H | -4.02195 | 2.241731 | -2.02673 | H | 9.270651 | 2.237086 | 1.123126 |
| H | -6.449   | 2.381037 | -1.58669 | H | 7.945838 | 1.896764 | -0.94959 |
| H | -7.30741 | 2.138769 | 0.725258 | H | 5.509494 | 1.993374 | -0.90416 |
| H | -5.71427 | 1.770789 | 2.59106  | C | -3.63866 | 2.404352 | -0.08044 |
| H | -3.30376 | 1.624809 | 2.158275 | C | -2.70103 | 2.892922 | 0.752684 |
| C | 5.611204 | 1.25434  | 0.278291 | C | 3.021675 | 2.362855 | 0.329435 |
| C | 4.581986 | 1.225717 | -0.58575 | C | 3.922804 | 2.524143 | 1.31641  |
| C | -1.03593 | 1.731701 | 0.5776   | H | -3.32596 | 1.801743 | -0.92813 |
| C | -2.05315 | 1.852617 | -0.29305 | H | -3.01799 | 3.452336 | 1.628563 |
| H | 5.407305 | 1.426085 | 1.33052  | H | 3.361572 | 2.059823 | -0.65669 |
| H | 4.785256 | 1.054785 | -1.63827 | H | 3.563795 | 2.779856 | 2.309595 |
| H | -1.25612 | 1.710772 | 1.6405   |   |          |          |          |
| H | -1.83094 | 1.88992  | -1.35509 |   |          |          |          |
